# Supplementary material for: Potential Suitable Habitats of Chili Pepper in China under Climate Change
Source: MDPI journal article supplement (doi:10.3390/plants13071027), 2024-04-04
Supplement: s1 [file s1]

# Supplementary Materials

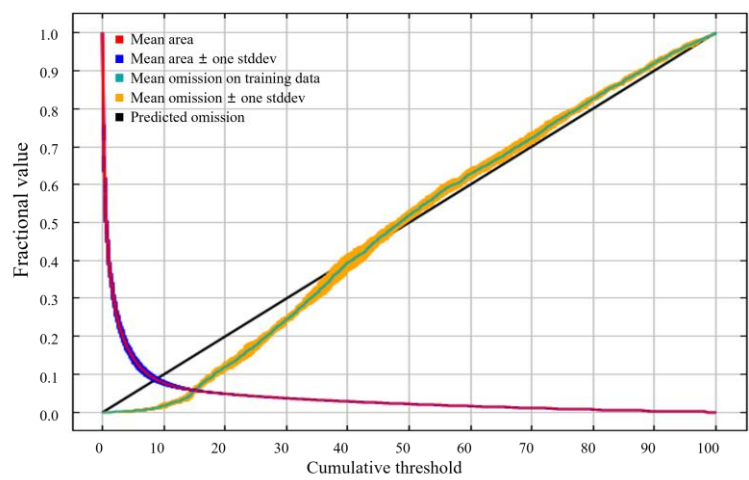

Figure S1. Average omission and predicted area for chili pepper.

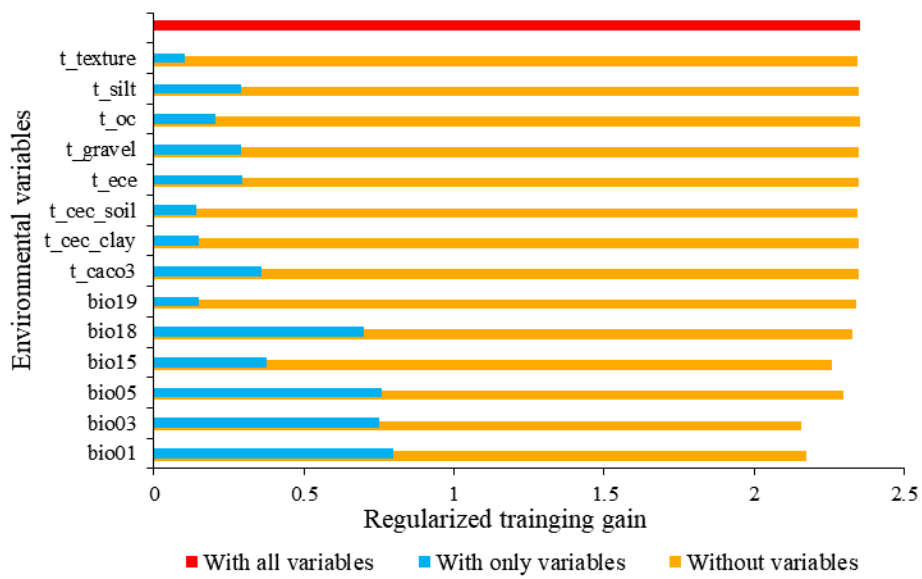

Figure S2. Jackknife of regularized training gain for chili pepper.

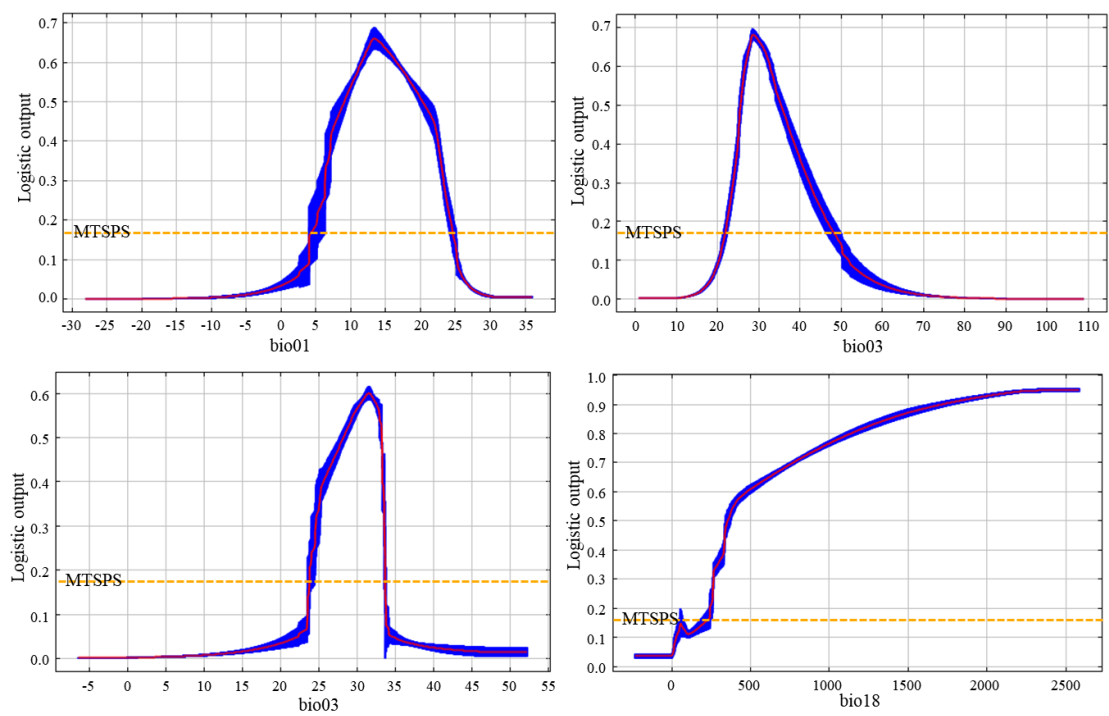

Figure S3. Response curves of the critical environmental variables.
